# Supplementary material for: Understanding the effect of HF-based wet shallow etching on optical performance of reactive-ion-etched fused silica optics
Source: Royal Society of Chemistry journal article supplement (doi:10.1039/d1ra04174f), 2021-01-01

**Figure S1.** Surface morphologies of the samples treated with RIE followed by HF/NH<sub>4</sub>F etching. Left: 1- $\mu$ m RIE and 1- $\mu$ m HF/NH<sub>4</sub>F etching, middle: 1- $\mu$ m RIE and 2- $\mu$ m HF/NH<sub>4</sub>F etching, right: 1- $\mu$ m RIE and 3- $\mu$ m HF/NH<sub>4</sub>F etching. The results showed that there was no obvious difference in surface morphology among the three HF/NH<sub>4</sub>F-etched sample surfaces.

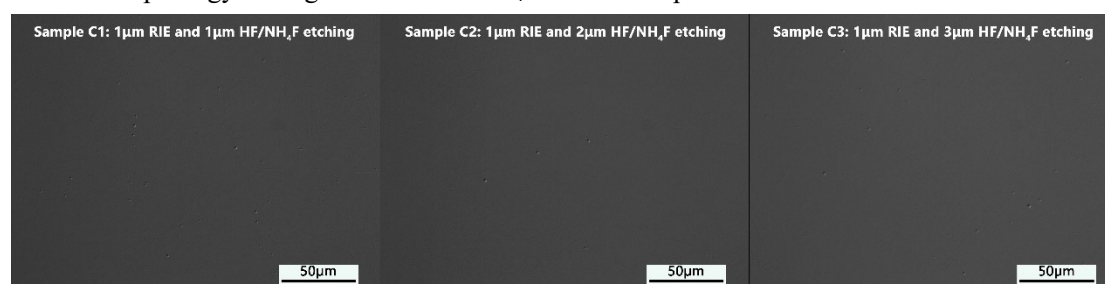

**Figure S2.** Raw data of the SC imaging for the six combined-etched samples. Left column: RIE and HF etching with removal amount of 1  $\mu$ m, 2  $\mu$ m, and 3  $\mu$ m. Right column: RIE and HF/NH<sub>4</sub>F etching with removal amounts of 1  $\mu$ m, 2  $\mu$ m, and 3  $\mu$ m.

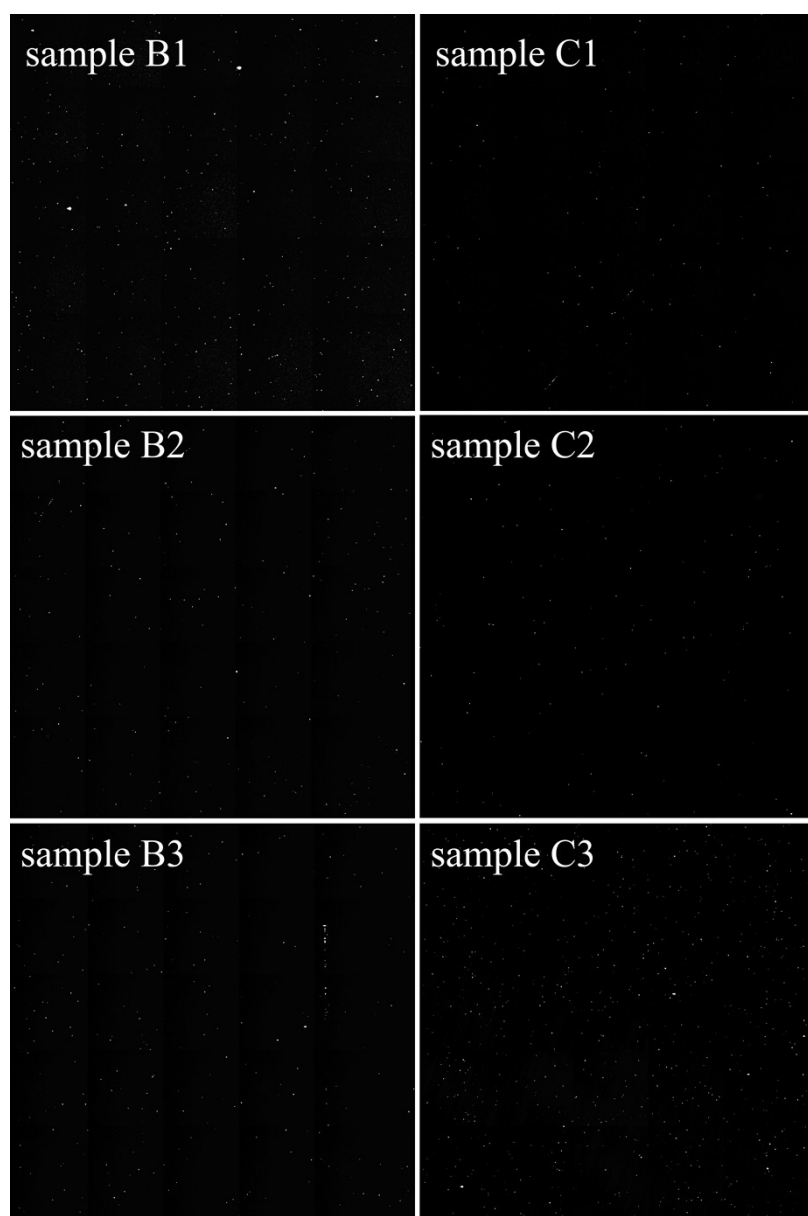

**Figure S3.** Statistical data of the SC imaging for the six combined-etched samples. Left column: RIE and HF etching with removal amount of 1  $\mu\text{m}$ , 2  $\mu\text{m}$ , and 3  $\mu\text{m}$ . Right column: RIE and HF/ $\text{NH}_4\text{F}$  etching with removal amounts of 1  $\mu\text{m}$ , 2  $\mu\text{m}$ , and 3  $\mu\text{m}$ .

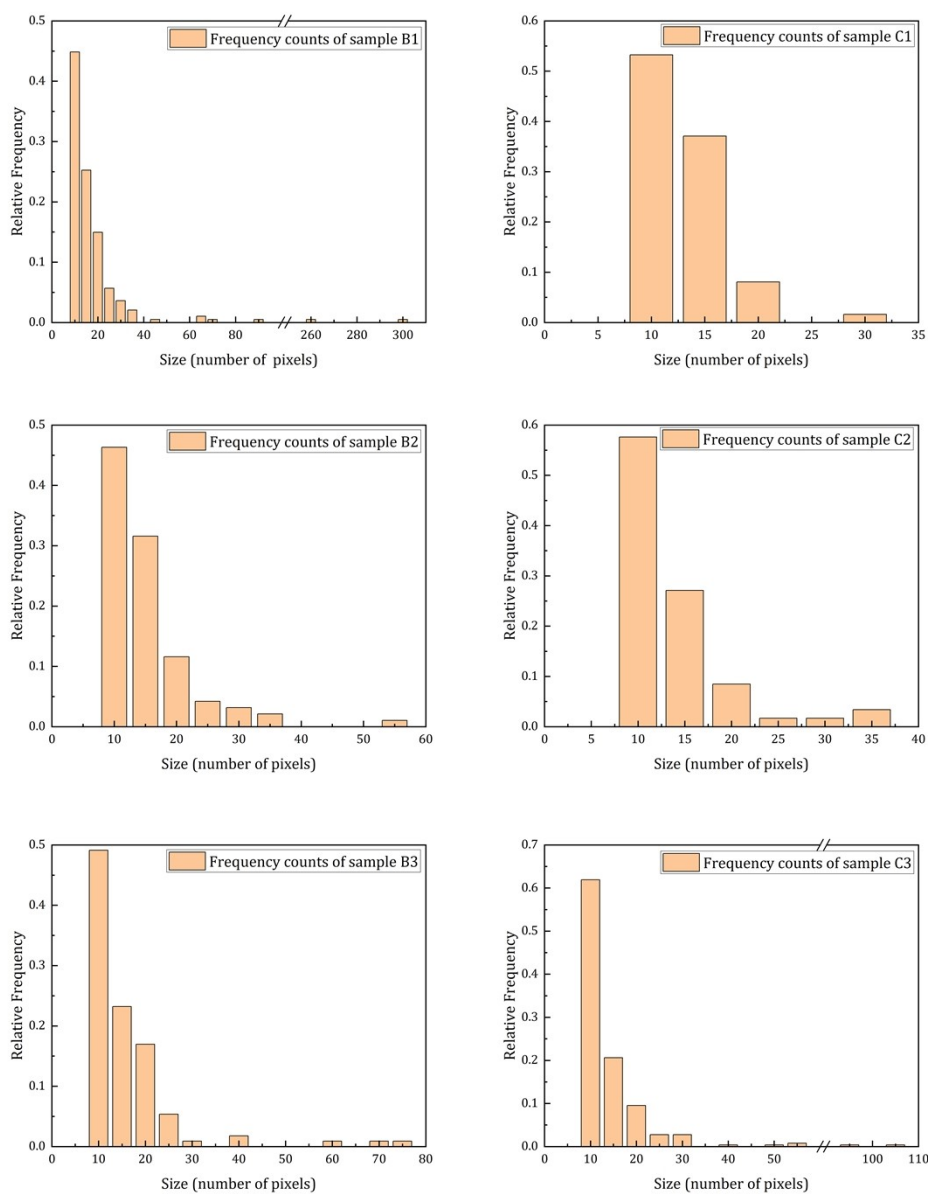

**Figure S4.** Raw data of the SC imaging for sample C3 (1- $\mu\text{m}$  RIE and 3- $\mu\text{m}$  HF/ $\text{NH}_4\text{F}$  etching).

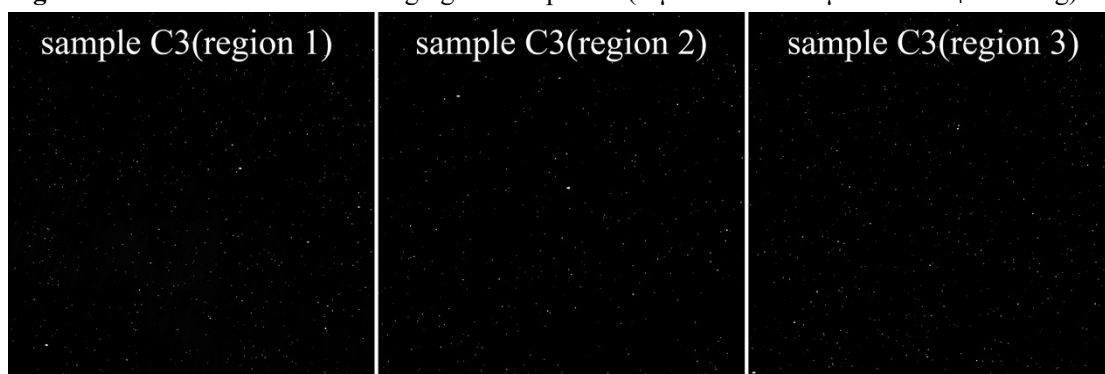

**Figure S5.** Statistical data of the SC imaging for sample C3 (1- $\mu\text{m}$  RIE and 3- $\mu\text{m}$  HF/ $\text{NH}_4\text{F}$  etching).

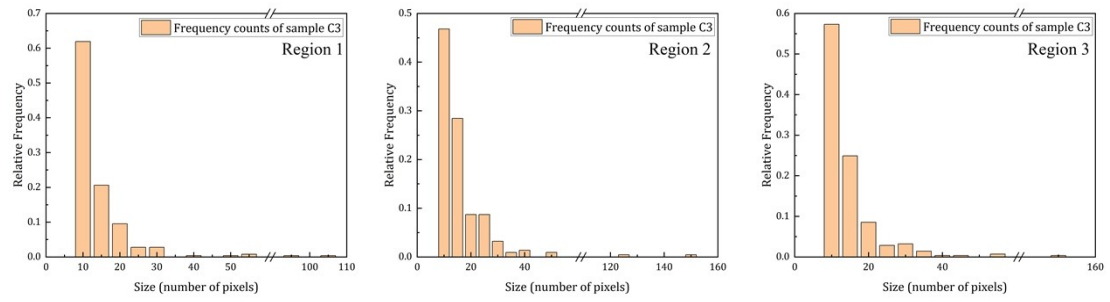

Supplement: d1ra04174f1.pdf [file d1ra04174f1.pdf]
